# Supplementary material for: Lactobacillus plantarum favors the early emergence of fit and fertile adult Drosophila upon chronic undernutrition
Source: Oxford University Press journal article supplement (doi:10.1242/jeb.151522), 2017-01-01
Supplement: jeb151522supp.pdf [file jeb151522supp.pdf]

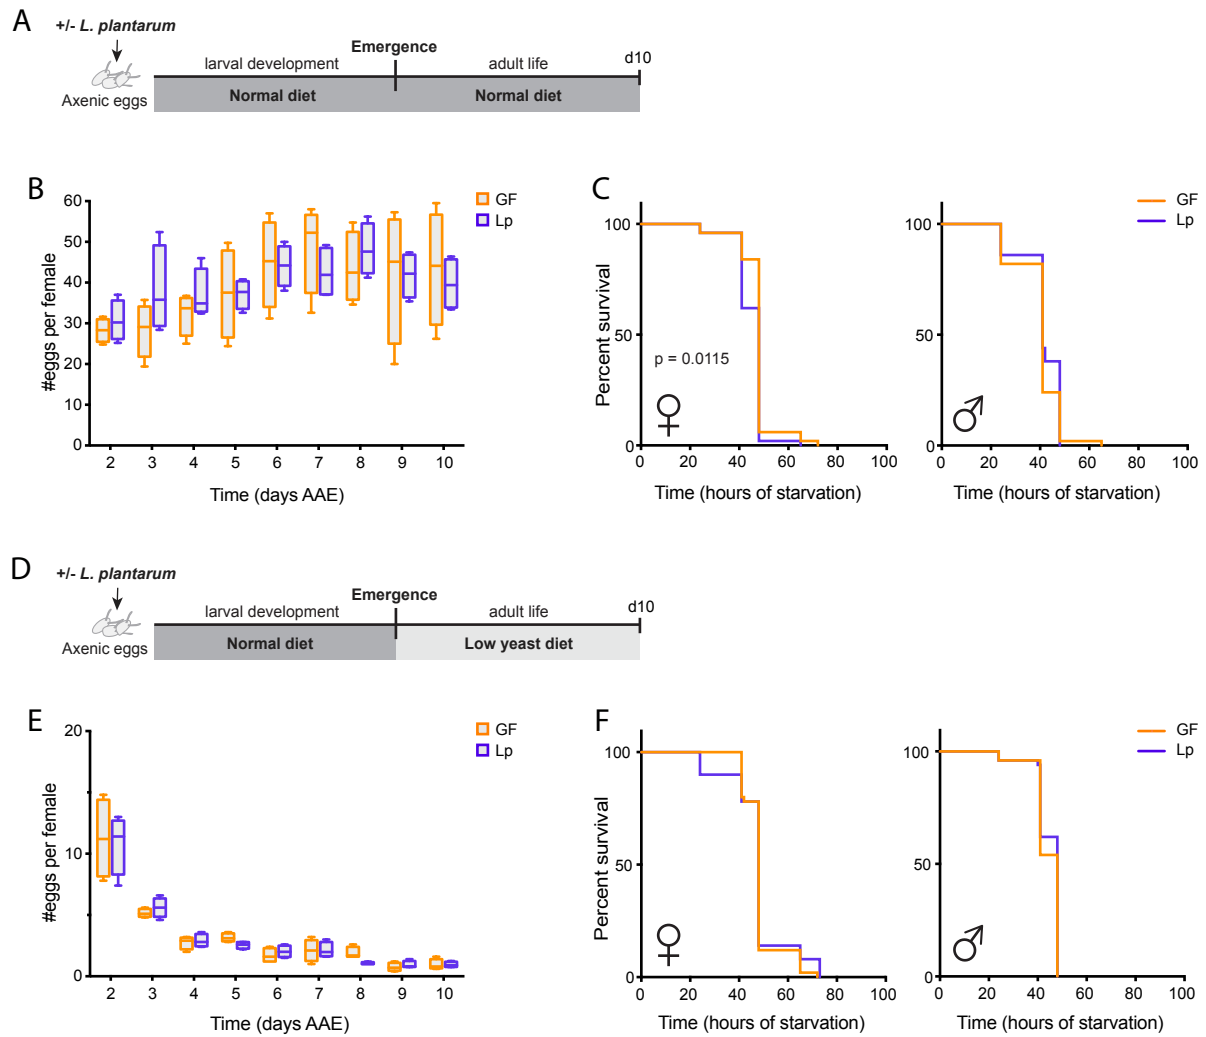

**Figure S1 (related to Fig.1). *Lactobacillus plantarum*<sup>WJL</sup> does not directly impact *Drosophila* adult fitness.** After larval development on a normal diet inoculated or not with *L.p.*<sup>WJL</sup>, adults were kept on the same normal diet (A) or transferred to a low yeast diet (D). In each case, the number of eggs laid per day was recorded (B, E) and the flies' resistance to complete starvation was assessed (C, F).

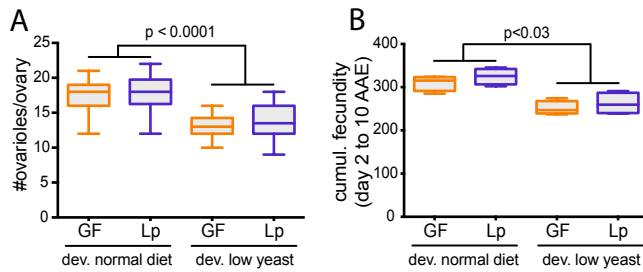

**Figure S2 (related to Fig. 2). The reproductive capacity of monoassociated *Drosophila* is not altered after accelerated larval development.** Number of ovarioles of adult females after development on a normal or a low yeast diet +/- *Lactobacillus plantarum*<sup>WJL</sup> (A) and the corresponding cumulative fecundities (number of eggs laid per female from day 2 to day 10 after adult emergence; AAE) (B).

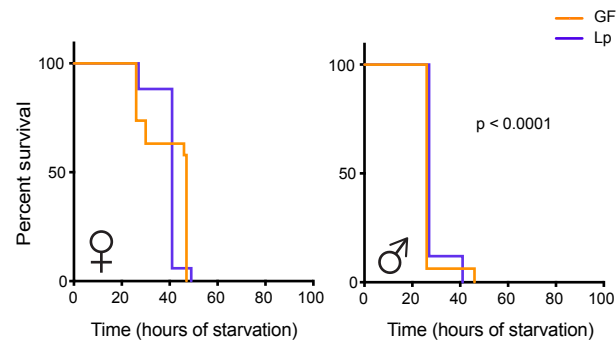

**Figure S3 (related to Fig. 3). The *Lactobacillus plantarum*<sup>WJL</sup>-mediated larval growth acceleration is not deleterious for adult fitness.** Full starvation resistance of 10 days old adults kept on an intermediate 30g yeast/L diet.

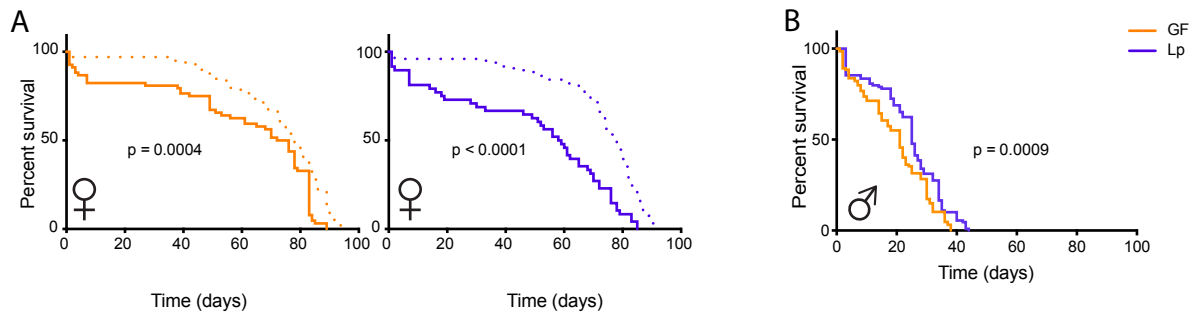

**Figure S4 (related to Fig. 4). *Lactobacillus plantarum*<sup>WJL</sup> increases the lifespan of nutritionally challenged males.** (A) Lifespan of axenic (germ-free, GF) or *L.p.*<sup>WJL</sup>-associated (Lp) female flies after larval development on a normal diet or on a low-yeast diet. (B) Repeat experiment of the lifespan study of nutritionally challenged males.

**Table S1.** Quantification of the fertility ratio variation across adult diets and statistical analysis

| Related to Figure 1C   |                    | Variance    | Brown-Forsythe test p-value |
|------------------------|--------------------|-------------|-----------------------------|
| GF                     | 50g dev/50g adults | 0,011296708 | 0.0037                      |
|                        | 50g dev/12g adults | 0,031983024 |                             |
|                        | 50g dev/6g adults  | 0,165964508 |                             |
| Lp                     | 50g dev/50g adults | 0,004924953 | 0.0003                      |
|                        | 50g dev/12g adults | 0,013486797 |                             |
|                        | 50g dev/6g adults  | 0,088402563 |                             |
| Related to Figure 2I-K |                    |             |                             |
| GF                     | 8g dev/50g adults  | 0,007101889 | 0.0003                      |
|                        | 8g dev/30g adults  | 0,012361203 |                             |
|                        | 8gdev/8g adults    | 0,05292651  |                             |
| Lp                     | 8g dev/50g adults  | 0,008243958 | < 0.0001                    |
|                        | 8g dev/30g adults  | 0,005389703 |                             |
|                        | 8gdev/8g adults    | 0,080373542 |                             |
